# Supplementary material
Source: Copernicus journal article supplement (doi:10.5194/egusphere-2026-2271)
Supplement: Supplementary file 1 [file egusphere-2026-2271-supplement.pdf]

1 **Desert Model Intercomparison Project benchmark framework version 1.0 for assessing**  
2 **land-surface dynamics and surface memory in monthly dust aerosol optical depth over**  
3 **North Africa**

4 **Marzieh Mokarram<sup>1</sup>, Mohammad Jafar Mokarram<sup>2\*</sup>, Huayu Lu<sup>3\*</sup>**

5 <sup>1</sup>*Department of Geography, Faculty of Economics, Management and Social Sciences, Shiraz*  
6 *University, Shiraz, Iran.*

7 <sup>2</sup>*School of Electronic Engineering and Intelligent Manufacturing, Anhui Xinhua University,*  
8 *Hefei, China*

9 <sup>3</sup>*School of Geography and Ocean Science, Nanjing University, Nanjing 210023, China.*

10  
11 \* *Corresponding author: Mohammad Jafar Mokarram and Huayu Lu (Email:*  
12 *mjmokarram@axhu.edu.cn, huayulu@nju.edu.cn)*

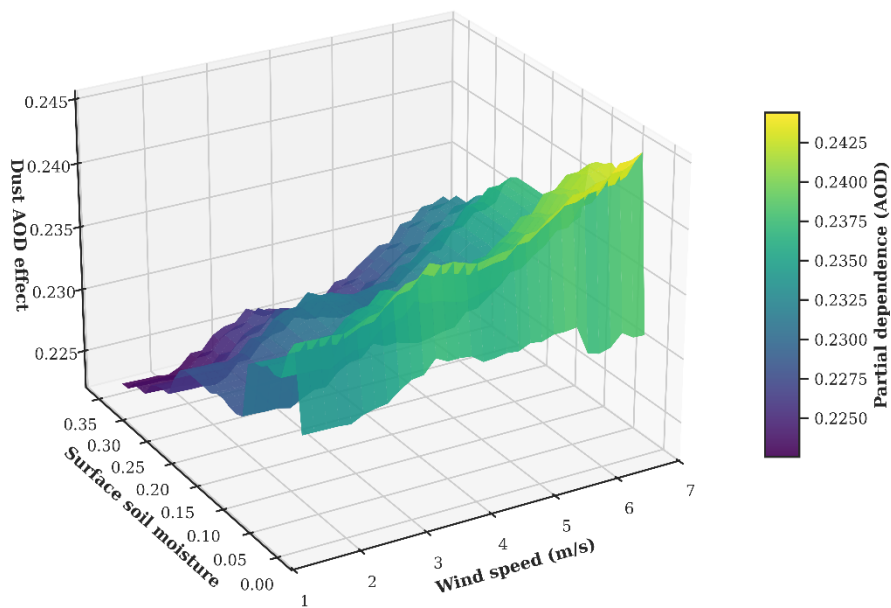

15 **Figure S1.** Three-dimensional partial-dependence surface illustrating the interaction between  
16 wind speed and soil moisture. High AOD values occur primarily under conditions characterized  
17 by strong winds and very low surface moisture.

18

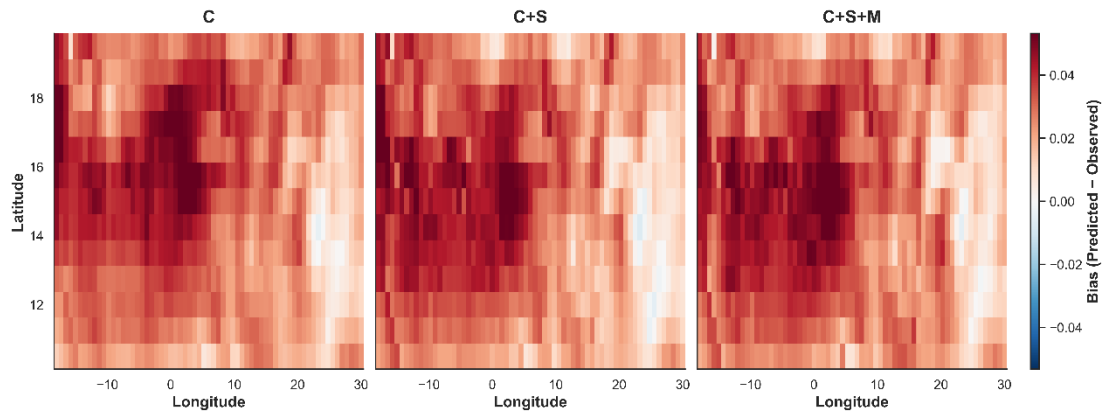

19

20 **Figure S2.** Spatial distribution of prediction error across the three model configurations. From  
 21 left to right: climate-only model (c), climate + surface configuration (C+S), and the full climate  
 22 + surface + memory model (C+S+M). The inclusion of surface and memory predictors reduces  
 23 the red overestimation clusters and increases the agreement between model predictions and  
 24 observational data.

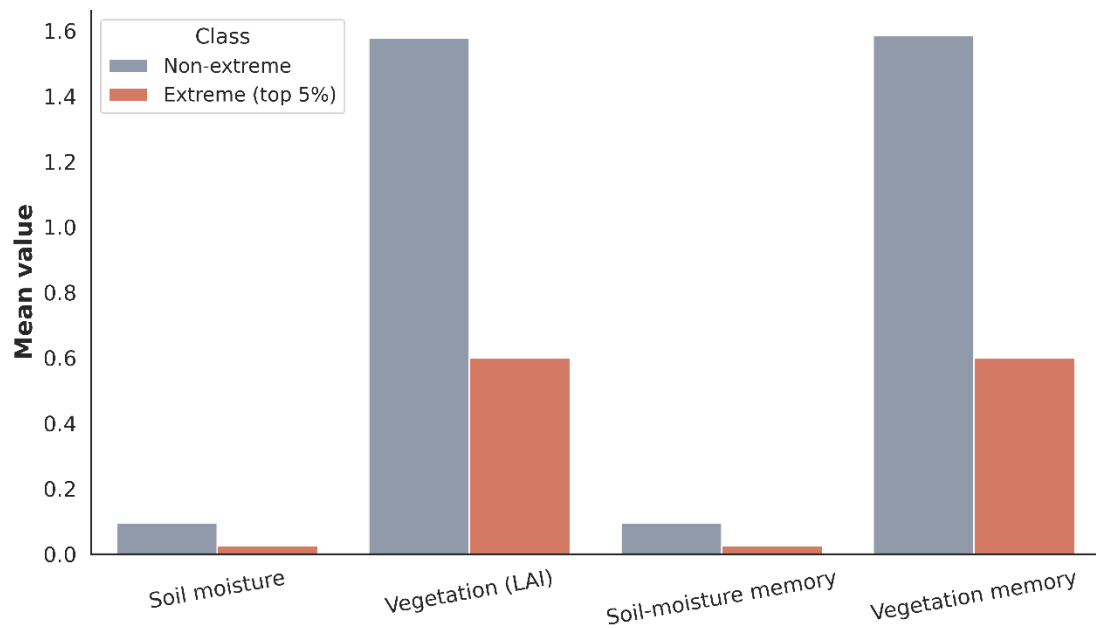

25

26 **Figure S3.** Comparison of antecedent land-surface conditions during extreme dust events  
 27 (upper 5% of the AOD distribution) and non-extreme conditions. Mean soil moisture, LAI, and  
 28 their lagged memory components appear substantially lower before extreme events. These  
 29 patterns highlight the role of cumulative dry periods and vegetation decline in preparing the  
 30 land surface for severe dust storms.

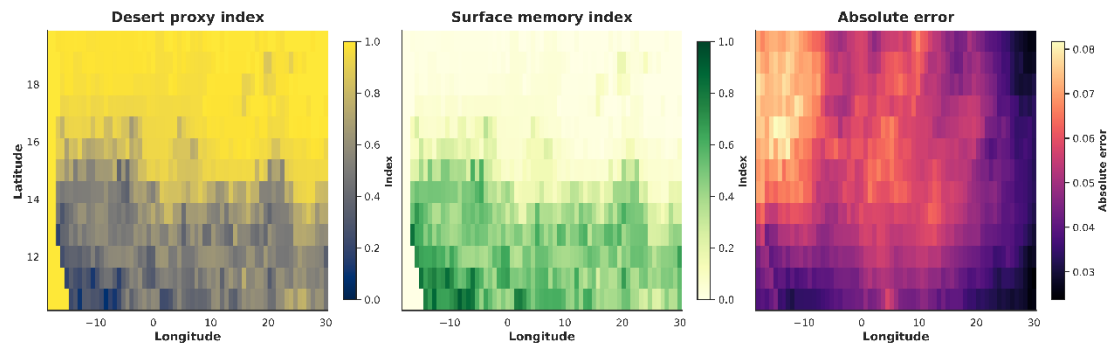

31

32 **Figure S4.** Spatial relationship between land-surface characteristics and model error.

33 The left panel shows the Desert Proxy Index, which represents the spatial gradient of aridity  
 34 and desert influence. The middle panel shows the Surface Memory Index derived from lagged  
 35 soil-moisture and vegetation conditions. The right panel shows the spatial distribution of  
 36 absolute model error in dust AOD reconstruction. Regions with stronger desert characteristics  
 37 generally exhibit larger errors, whereas areas with stronger surface memory tend to show  
 38 reduced errors.
